# Supplementary material for: CRHR1 polymorphism at rs242941, rs242940, and rs72834580: association of symptoms improvement with intranasal corticosteroids in allergic rhinitis Jordanian patients
Source: publisher site journal article supplement (doi:10.1515/dmpt-2023-0014), 2023-05-22
Supplement: Supplementary file 1 [file j_dmpt-2023-0014_suppl_001.docx]

**(Supplementary Information File)**

Malek Zihlif, Osama H. Abusara*, Walid Al-Qerem, Mahmood Al-Ibadah, Tareq M. Mahafza, Fatima M. Al-Akhras and Naseem T. Mahafza

***CRHR1* polymorphism at rs242941, rs242940, and rs72834580: association of symptoms improvement with intranasal corticosteroids in allergic rhinitis Jordanian patients**

**Malek Zihlif** and **Osama H. Abusara** contributed equally to this work.

**Corresponding author**: Dr. Osama H. Abusara, Department of Pharmacy, Faculty of Pharmacy, Al-Zaytoonah University of Jordan, P.O.Box 130, Amman 11733, Jordan, Phone: +96264291511, E-mail: [o.abusara@zuj.edu.jo](mailto:o.abusara@zuj.edu.jo). https://orcid.org/0000-0002-0856-5618

**Malek Zihlif**: Department of Pharmacology, School of Medicine, The University of Jordan, Amman, Jordan

**Walid Al-Qerem**: Department of Pharmacy, Faculty of Pharmacy, Al-Zaytoonah University of Jordan, Amman, Jordan. <https://orcid.org/0000-0001-9831-7572>

**Mahmood Al-Ibadah**: Department of Pharmacy, Faculty of Pharmacy, Al-Zaytoonah University of Jordan, Amman, Jordan

**Tareq M. Mahafza**: Department of Special Surgery, School of Medicine, The University of Jordan, Amman, Jordan

**Fatima M. Al-Akhras**: Molecular Biology Research Laboratory, School of Medicine, The University of Jordan, Amman, Jordan

**Naseem T. Mahafza**: Department of Special Surgery, School of Medicine, The University of Jordan, Amman, Jordan

**Supplementary Table 1**. Univariate Analysis for the Co-dominant Genotypes, Alleles, and Haplotypes of the 3 SNPs Effects on Each Symptom Improvement Post-treatment

|  | | **Nasal obstruction** | | **Sneezing** | | **Nasal itching** | | **Palatal itching** | | **Ear fullness/blockage** | | **Eye itching** | | **Eye redness** | | **Daily activity** | | **Performance** | |
| --- | --- | --- | --- | --- | --- | --- | --- | --- | --- | --- | --- | --- | --- | --- | --- | --- | --- | --- | --- |
| **No** | **Yes** | **No** | **Yes** | **No** | **Yes** | **No** | **Yes** | **No** | **Yes** | **No** | **Yes** | **No** | **Yes** | **No** | **Yes** | **No** | **Yes** |
| **(rs242941) AA**  **(rs242941) AC**  **(rs242941) CC** |  | 3 (8.8%) | 9 (15.5%) | 3 (8.8%) | 8 (14.8%) | 3 (11.5%) | 9 (20%) | 3 (10.3%) | 6 (22.2%) | 3 (15%) | 6 (16.2%) | 3 (7.9%) | 6 (17.6%) | 2 (6.5%) | 6 (20%) | 5 (17.9%) | 9 (20%) | 4 (15.4%) | 9 (20.9%) |
|  | 18 (52.9%) | 29 (50%) | 14 (41.2%) | 29 (53.7%) | 10 (38.5%) | 22 (48.9%) | 14 (48.3%) | 13 (48.1%) | 6 (30%) | 18 (48.6%) | 18 (47.4%) | 18 (52.9%) | 14 (45.2%) | 17 (56.7%) | 14 (50%) | 22 (48.9%) | 13 (50%) | 22 (51.2%) |
|  | 13 (38.2%) | 20 (34.5%) | 17 (50%) | 17 (31.5%) | 13 (50%) | 14 (31.1%) | 12 (41.4%) | 8 (29.6%) | 11 (55%) | 13 (35.1%) | 17 (44.7%) | 10 (29.4%) | 15 (48.4%) | 7 (23.3%) | 9 (32.1%) | 14 (31.1%) | 9 (34.6%) | 12 (27.9%) |
| ***p*** | 0.652 | | 0.210 | | 0.267 | | 0.413 | | 0.316 | | 0.272 | | 0.075 | | 0.975 | | 0.776 | |
| **(rs242940) AA**  **(rs242940) AG**  **(rs242940) GG** |  | 14 (41.2%) | 26 (44.8%) | 12 (35.3%) | 24 (44.4%) | 9 (34.6%) | 21 (46.7%) | 12 (41.4%) | 12 (44.4%) | 6 (30%) | 17 (45.9%) | 16 (44.1%) | 15 (47.2%) | 14 (45.2%) | 15 (50%) | 12 (42.9%) | 18 (40%) | 10 (38.5%) | 18 (41.9%) |
|  | 17 (50%) | 24 (41.4%) | 18 (52.9%) | 22 (40.7%) | 15 (57.7%) | 16 (35.6%) | 12 (41.4%) | 11 (40.7%) | 10 (50%) | 15 (40.5%) | 17 (44.7%) | 14 (41.2%) | 13 (41.9%) | 11 (36.7%) | 13 (46.4%) | 18 (40%) | 13 (50%) | 17 (39.5%) |
|  | 3 (8.8%) | 8 (13.8%) | 4 (11.8%) | 8 (14.8%) | 2 (7.7%) | 8 (17.8%) | 5 (17.2%) | 4 (14.8%) | 4 (20%) | 5 (13.5%) | 5 (13.2%) | 5 (14.7%) | 4 (12.9%) | 4 (13.3%) | 3 (10.7%) | 9 (20%) | 3 (11.5%) | 8 (18.6%) |
| ***p*** | 0.649 | | 0.535 | | 0.165 | | 0.959 | | 0.489 | | 0.951 | | 0.912 | | 0.575 | | 0.618 | |
| **(rs72834580) GG**  **(rs72834580) GC** |  | 25 (73.5%) | 38 (65.5%) | 26 (76.5%) | 35 (64.8%) | 20 (76.9%) | 28 (62.2%) | 18 (62.1%) | 20 (74.1%) | 15 (75%) | 26 (70.3%) | 28 (73.3%) | 22 (64.7%) | 23 (74.2%) | 19 (63.3%) | 19 (67.9%) | 29 (64.4%) | 18 (69.2%) | 27 (62.8%) |
|  | 9 (26.5%) | 20 (34.5%) | 8 (23.5%) | 19 (35.2%) | 6 (23.1%) | 17 (37.8%) | 11 (37.9%) | 7 (25.9%) | 5 (25%) | 11 (29.7%) | 10 (26.3%) | 12 (35.3%) | 8 (25.8%) | 11 (36.7%) | 9 (32.1%) | 16 (35.6%) | 8 (30.8%) | 16 (37.2%) |
| ***p*** | 0.425 | | 0.248 | | 0.202 | | 0.336 | | 0.704 | | 0.409 | | 0.360 | | 0.765 | | 0.586 | |
| **(rs242941) allele** | **A** | 24 (35.3 %) | 47 (40.50%) | 20 (29.4%) | 45 (41.7%) | 16 (30.8%) | 40 (44.4%) | 20 (34.5%) | 25 (46.3%) | 12 (30%) | 30 (40.5%) | 24 (31.6%) | 30 (44.1%) | **18 (29%)** | **29 (48.3%)** | 24 (42.9%) | 40 (44.4%) | 21 (40.4%) | 40 (46.5%) |
| **C** | 44 (64.7%) | 47 (59.5%) | 48 (70.6%) | 63 (58.3%) | 36 (69.2%) | 50 (55.6%) | 38 (65.5%) | 29 (53.7%) | 28 (70%) | 44 (59.5%) | 52 (68.4%) | 38 (55.9%) | **44 (71%)** | **31 (51.7%)** | 32 (57.1%) | 50 (55.6%) | 31 (59.6%) | 46 (53.5%) |
|  | ***p*** | 0.482 | | 0.101 | | 0.108 | | 0.203 | | 0.266 | | 0.121 | | **0.029** | | 0.851 | | 0.482 | |
| **(rs242940) allele** | **A** | 45 (66.2%) | 76 (65.5%) | 42 (61.8%) | 70 (64.8%) | 33 (63.5%) | 58 (64.4%) | 36 (62.1%) | 35 (64.8%) | 22 (55%) | 49 (66.2%) | 49 (64.5%) | 44 (64.7%) | 41 (66.1%) | 41 (68.3%) | 37 (66.1%) | 54 (60%) | 33 (63.5%) | 53 (61.6%) |
| **G** | 23 (33.8%) | 40 (34.5%) | 26 (38.2%) | 64 (36.4%) | 19 (36.5%) | 32 (35.6%) | 22 (37.9%) | 19 (35.2%) | 18 (45%) | 25 (33.8%) | 27 (35.5%) | 24 (35.3%) | 21 (33.9%) | 19 (31.7%) | 19 (33.9%) | 36 (40%) | 19 (36.5%) | 33 (38.4%) |
|  | ***p*** | 0.928 | | 0.682 | | 0.906 | | 0.763 | | 0.238 | | 0.977 | | 0.795 | | 0.462 | | 0.829 | |
| **(rs72834580) allele** | **C** | 9 (13.2%) | 20 (17.2%) | 8 (11.8%) | 19 (17.6%) | 6 (11.5%) | 17 (18.9%) | 11 (19%) | 7 (13%) | 5 (12.5%) | 11 (14.9%) | 10 (13.2%) | 12 (17.6%) | 8 (12.9%) | 11 (18.3%) | 9 (16.1%) | 16 (17.8%) | 8 (15.4%) | 16 (18.6%) |
| **G** | 59 (86.8%) | 96 (82.8%) | 60 (88.2%) | 89 (82.4%) | 46 (88.5%) | 73 (81.1%) | 47 (81%) | 47 (87%) | 35 (87.5%) | 63 (85.1%) | 66 (86.8%) | 56 (82.4%) | 54 (87.1%) | 49 (81.7%) | 47 (83.9%) | 74 (82.2%) | 44 (84.6%) | 70 (81.4%) |
|  | ***p*** | 0.472 | | 0.296 | | 0.252 | | 0.387 | | 0.729 | | 0.455 | | 0.408 | | 0.790 | | 0.629 | |
| **Haplotypes** | **AAC** | 9 (13.2%) | 20 (17.2%) | 8 (11.8%) | 19 (17.6%) | 6 (11.5%) | 17 (18.9%) | 11 (19%) | 7 (13%) | 5 (12.5%) | 11 (14.9%) | 10 (13.2%) | 12 (17.6%) | 8 (12.9%) | 11 (18.3%) | 9 (16.1%) | 16 (17.8%) | 8 (15.4%) | 16 (18.6%) |
| **AAG** | 15 (22.1%) | 27 (23.3%) | 12 (17.6%) | 26 (24.1%) | 10 (19.2%) | 23 (25.6%) | 9 (15.5%) | 18 (33.3%) | 7 (17.5%) | 19 (25.7%) | 14 (18.4%) | 18 (26.5%) | 10 (16.1%) | 18 (30%) | 15 (26.8%) | 24 (26.7%) | 13 (25%) | 24 (27.9%) |
| **CAG** | 21 (30.9%) | 29 (25%) | 22 (32.4%) | 25 (23.1%) | 17 (32.7%) | 18 (20%) | 16 (27.6%) | 10 (18.5%) | 10 (25%) | 19 (25.7%) | 25 (32.9%) | 14 (20.6%) | 23 (37.1%) | 12 (20%) | 13 (23.2%) | 14 (15.6%) | 12 (23.1%) | 13 (25.1%) |
| **CGG** | 23 (33.8%) | 40 (34.5%) | 26 (38.2%) | 38 (35.2%) | 19 (36.5%) | 32 (35.6%) | 22 (37.9%) | 19 (35.2%) | 18 (45%) | 25 (33.8%) | 27 (35.5%) | 24 (35.3%) | 21 (33.9%) | 19 (31.7%) | 19 (33.9%) | 36 (40%) | 19 (36.5%) | 33 (38.4%) |
|  | ***p*** | 0.797 | | 0.369 | | 0.280 | | 0.147 | | 0.629 | | 0.317 | | 0.099 | | 0.684 | | 0.692 | |

*p*: p-value; No: no symptom improvement post-treatment; Yes: symptom improvement post-treatment
